# Supplementary material for: Cognitive Interviewing during Pretesting of the Prefinal Afrikaans for the Western Cape Disabilities of the Arm, Shoulder and Hand Questionnaire following Translation and Cross-Cultural Adaptation
Source: Hindawi journal article supplement (doi:10.1155/2020/3749575), 2020-10-10
Supplement: f1 [file 3749575.f1.pdf]

## Cognitive interviewing probes

### Examples of verbal probes during cognitive interviewing:

| Cognitive probe                             | Example                                                                                                                                                                                                                                                                                     | Document during CI |
|---------------------------------------------|---------------------------------------------------------------------------------------------------------------------------------------------------------------------------------------------------------------------------------------------------------------------------------------------|--------------------|
| <b>Comprehension / Interpretation probe</b> | What does the term “bietjie moelik” mean to you?<br><br>What does the term..... mean to you?<br><br>Was the instructions clear?<br><br>What do you think of the name of the questionnaire?<br><br>What do you think about the layout of the questionnaire?<br><br>Is the font large enough? |                    |
| <b>Paraphrasing</b>                         | Can you repeat the question in your own words                                                                                                                                                                                                                                               |                    |
| <b>Confidence judgement</b>                 | How sure are you that you are unable to do heavy household chores?                                                                                                                                                                                                                          |                    |

|                       |                                                                            |  |
|-----------------------|----------------------------------------------------------------------------|--|
| <b>Recall probe</b>   | How do you remember you pain levels this past week?                        |  |
| <b>Specific probe</b> | Why do you think you are “minder werd” due to your hand problem or injury? |  |
| <b>General probe</b>  | How did you get to your specific answer? Was it easy or hard to answer?    |  |
